# Supplementary material
Source: PubMed Central journal article supplement (PMC384774)

**A.**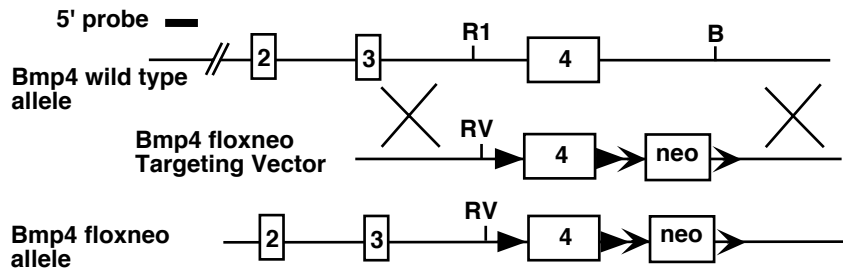**B.**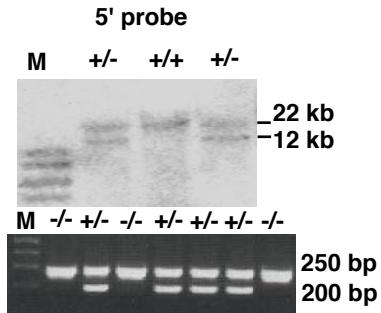

Supplement: pnas_101_13_4489__2.pdf [file pnas_101_13_4489__2.pdf]
